# Supplementary material
Source: publisher figshare collection journal article supplement (https://gsapubs.figshare.com/articles/dataset/_/25086050)
Supplement: Supplementary file 1 [file 1]

Morris, N., Potra, A., and Samuelsen, J.R., 2023, Constraining the provenance of black shales using rare earth elements and neodymium isotopes, Midcontinent United States: GSA Bulletin, <https://doi.org/10.1130/B37264.1>.

## Supplemental Material

**Table S1.** Locality information for each sample.

**Table S2.** Detailed mineralogical compositions of each sample based on X-ray diffraction measurements.

**Table S3.** Trace-element concentrations in each sample (in ppm).

**Table S4.** Trace-element concentration uncertainty ( $1\sigma$ ).

**Table S5.** Calculated dissimilarity values of each sample relative to other samples. Lower values correspond with increasing similarity in rare earth element patterns.

Table S1

| <b>Formation</b> | <b>Member</b> | <b>Sample ID</b>         | <b>Age</b>    | <b>Locality</b>       | <b>Coordinates</b>    | <b>Basin/Province</b> |
|------------------|---------------|--------------------------|---------------|-----------------------|-----------------------|-----------------------|
| Oread            | Heebner       | <b>9 Heebner</b>         | Pennsylvanian | Lawrence, KS          | 38.956984, -95.319143 | Cherokee-Forest City  |
| Oread            | Heebner       | <b>13 Heebner</b>        | Pennsylvanian | Plattsmouth, NE       | 40.987332, -95.860284 | Cherokee-Forest City  |
| Stanton          | Eudora        | <b>15 Eudora</b>         | Pennsylvanian | Gretna, NE            | 41.020087, -96.249668 | Cherokee-Forest City  |
| Stanton          | Eudora        | <b>21 Eudora</b>         | Pennsylvanian | Kansas City, MO       | 39.243871, -94.495858 | Cherokee-Forest City  |
| Vilas            | —             | <b>15 Vilas</b>          | Pennsylvanian | Gretna, NE            | 41.020087, -96.249668 | Cherokee-Forest City  |
| Iola             | Muncie Creek  | <b>11-1 Muncie Creek</b> | Pennsylvanian | Muncie, KS            | 39.105029, -94.696840 | Cherokee-Forest City  |
| Iola             | Muncie Creek  | <b>11-2 Muncie Creek</b> | Pennsylvanian | Muncie, KS            | 39.105029, -94.696840 | Cherokee-Forest City  |
| Dennis           | Stark         | <b>2 Stark</b>           | Pennsylvanian | Stark, KS             | 37.688367, -95.197550 | Cherokee-Forest City  |
| Swope            | Hushpuckney   | <b>5 Hushpuckney</b>     | Pennsylvanian | Mound City, KS        | 38.115926, -94.851675 | Cherokee-Forest City  |
| Swope            | Hushpuckney   | <b>6 Hushpuckney</b>     | Pennsylvanian | Lacygne, KS           | 38.356363, -94.687232 | Cherokee-Forest City  |
| Swope            | Hushpuckney   | <b>8 Hushpuckney</b>     | Pennsylvanian | Fontana, KS           | 38.402554, -94.813937 | Cherokee-Forest City  |
| Swope            | Hushpuckney   | <b>20 Hushpuckney</b>    | Pennsylvanian | Kansas City, MO       | 39.013522, -94.502805 | Cherokee-Forest City  |
| Fort Scott       | Little Osage  | <b>3 Little Osage</b>    | Pennsylvanian | Fort Scott, KS        | 37.873814, -94.704829 | Cherokee-Forest City  |
| Stephens Forest  | Little Osage  | <b>16A Little Osage</b>  | Pennsylvanian | Van Meter, IA         | 41.537628, -93.973555 | Cherokee-Forest City  |
| Excello          | —             | <b>1 Excello</b>         | Pennsylvanian | Oswego, KS            | 37.175243, -95.102767 | Cherokee-Forest City  |
| Excello          | —             | <b>17 Excello</b>        | Pennsylvanian | Booneville, IA        | 41.532000, -93.872849 | Cherokee-Forest City  |
| Excello          | —             | <b>19 Excello</b>        | Pennsylvanian | Excello, MO           | 39.636663, -92.492791 | Cherokee-Forest City  |
| Atoka            | upper         | <b>UA1Sh</b>             | Pennsylvanian | Morrilton, AR         | 35.156467, -92.719217 | Arkoma Basin          |
| Atoka            | lower         | <b>LA1Sh</b>             | Pennsylvanian | Perry, AR             | 35.039533, -92.795967 | Arkoma Basin          |
| Atoka            | lower         | <b>LA2Sh</b>             | Pennsylvanian | Mt. Moriah, AR        | 34.135717, -93.700383 | Arkoma Basin          |
| Atoka            | —             | <b>Atoka 2</b>           | Pennsylvanian | Morrilton, AR         | 35.148467, -92.720383 | Arkoma Basin          |
| Jackfork         | upper         | <b>UJ1Sh</b>             | Pennsylvanian | Williams Junction, AR | 34.857433, -92.767617 | Ouachita Mtns         |
| Jackfork         | upper         | <b>UJ2Sh</b>             | Pennsylvanian | Mt. Moriah, AR        | 34.147483, -93.715833 | Ouachita Mtns         |
| Jackfork         | middle        | <b>MJ1</b>               | Pennsylvanian | Pinnacle, AR          | 34.843100, -92.462917 | Ouachita Mtns         |
| Jackfork         | middle        | <b>MJ2</b>               | Pennsylvanian | Northpoint, AR        | 34.876500, -92.614400 | Ouachita Mtns         |
| Jackfork         | lower         | <b>LJ1</b>               | Pennsylvanian | Williams Junction, AR | 34.840783, -92.767917 | Ouachita Mtns         |
| Fayetteville     | lower         | <b>FS1L</b>              | Mississippian | Weddington, AR        | 36.099378, -94.395122 | Ozark Dome            |
| Fayetteville     | upper         | <b>FS2U</b>              | Mississippian | Fayetteville, AR      | 36.042400, -94.191200 | Ozark Dome            |
| Fayetteville     | —             | <b>FS3</b>               | Mississippian | Fayetteville, AR      | 36.045778, -94.180353 | Ozark Dome            |
| Fayetteville     | —             | <b>FS4</b>               | Mississippian | Fayetteville, AR      | 36.040833, -94.174528 | Ozark Dome            |
| Fayetteville     | lower         | <b>FS6L</b>              | Mississippian | Fayetteville, AR      | 36.092586, -94.152103 | Ozark Dome            |
| Fayetteville     | lower         | <b>FS7L</b>              | Mississippian | Elkins, AR            | 36.027800, -94.012700 | Ozark Dome            |
| Fayetteville     | upper         | <b>FS8UU</b>             | Mississippian | Huntsville, AR        | 36.119692, -93.740072 | Ozark Dome            |
| Fayetteville     | upper         | <b>FS9LU</b>             | Mississippian | Huntsville, AR        | 36.119719, -93.739983 | Ozark Dome            |
| Fayetteville     | lower         | <b>FS10L</b>             | Mississippian | Huntsville, AR        | 36.119861, -93.739386 | Ozark Dome            |
| Fayetteville     | —             | <b>FS11</b>              | Mississippian | Fayetteville, AR      | 36.070272, -94.167028 | Ozark Dome            |
| Stanley          | —             | <b>Stanley 1</b>         | Mississippian | Hot Springs, AR       | 34.505850, -92.969133 | Ouachita Mtns         |
| Stanley          | —             | <b>Stanley 2</b>         | Mississippian | Hot Springs, AR       | 34.469300, -93.088067 | Ouachita Mtns         |
| Stanley          | —             | <b>Stanley 3</b>         | Mississippian | Hot Springs, AR       | 34.469300, -93.088067 | Ouachita Mtns         |

Table S1

|             |       |                            |               |                     |                       |                |
|-------------|-------|----------------------------|---------------|---------------------|-----------------------|----------------|
| Stanley     | —     | <b>Stanley 4</b>           | Mississippian | Glenwood, AR        | 34.375567, -93.566250 | Ouachita Mtns  |
| Chattanooga | —     | <b>CS1</b>                 | Devonian      | Tahlequah, OK       | 35.926292, -94.927411 | Ozark Dome     |
| Chattanooga | —     | <b>CS2</b>                 | Devonian      | Proctor, OK         | 35.955250, -94.814236 | Ozark Dome     |
| Chattanooga | —     | <b>CS3</b>                 | Devonian      | Proctor, OK         | 35.967667, -94.791722 | Ozark Dome     |
| Chattanooga | —     | <b>CS4</b>                 | Devonian      | Kansas, OK          | 36.211103, -94.771083 | Ozark Dome     |
| Chattanooga | —     | <b>CS5</b>                 | Devonian      | Flint Creek, OK     | 36.190972, -94.721250 | Ozark Dome     |
| Chattanooga | —     | <b>CS6</b>                 | Devonian      | Siloam Springs, AR  | 36.112311, -94.533322 | Ozark Dome     |
| Chattanooga | —     | <b>CS7</b>                 | Devonian      | Savoy, AR           | 36.106653, -94.339125 | Ozark Dome     |
| Chattanooga | —     | <b>CS8</b>                 | Devonian      | Jane, MO            | 36.561322, -94.343603 | Ozark Dome     |
| Chattanooga | —     | <b>CS9</b>                 | Devonian      | Jane, MO            | 36.546711, -94.327603 | Ozark Dome     |
| Chattanooga | lower | <b>CS10B</b>               | Devonian      | Pineville, MO       | 36.504072, -94.258875 | Ozark Dome     |
| Chattanooga | —     | <b>CS11</b>                | Devonian      | Bella Vista, AR     | 36.496800, -94.265400 | Ozark Dome     |
| Chattanooga | —     | <b>CS12</b>                | Devonian      | Bella Vista, AR     | 36.450400, -94.240300 | Ozark Dome     |
| Chattanooga | —     | <b>CS13</b>                | Devonian      | Rogers, AR          | 36.331836, -94.020014 | Ozark Dome     |
| New Albany  | —     | <b>Ceja Corp Morris #1</b> | Devonian      | Neoga, IL           | 39.337800, -88.516500 | Illinois Basin |
| Polk Creek  | —     | <b>Polk Creek 1</b>        | Ordovician    | Little Rock, AR     | 34.715317, -92.401217 | Ouachita Mtns  |
| Polk Creek  | —     | <b>PC1</b>                 | Ordovician    | Washita, AR         | 34.652783, -93.500333 | Ouachita Mtns  |
| Womble      | —     | <b>Womble 1</b>            | Ordovician    | Crystal Springs, AR | 34.514117, -93.381017 | Ouachita Mtns  |
| Womble      | —     | <b>Womble 2</b>            | Ordovician    | Norman, AR          | 34.450400, -93.670417 | Ouachita Mtns  |
| Womble      | —     | <b>Womble 3</b>            | Ordovician    | Little Rock, AR     | 34.715317, -92.401217 | Ouachita Mtns  |
| Mazarn      | —     | <b>Mazarn 1</b>            | Ordovician    | Mt. Ida, AR         | 34.590150, -93.572117 | Ouachita Mtns  |
| Mazarn      | —     | <b>Mazarn 2</b>            | Ordovician    | Mt. Ida, AR         | 34.539200, -93.444950 | Ouachita Mtns  |
| Mazarn      | —     | <b>Mazarn 3</b>            | Ordovician    | Crystal Springs, AR | 34.521867, -93.377283 | Ouachita Mtns  |
| Mazarn      | —     | <b>Mazarn 4</b>            | Ordovician    | Norman, AR          | 34.465617, -93.676983 | Ouachita Mtns  |
| Collier     | —     | <b>Collier CS1</b>         | Camb.-Ordo.   | Mt. Ida, AR         | 34.523183, -93.395700 | Ouachita Mtns  |
| Tunnel City | —     | <b>UPH-1-658</b>           | Cambrian      | Winslow, IL         | 42.504940, -89.852062 | Illinois Basin |
| Eau Claire  | —     | <b>HwyA-2-520</b>          | Cambrian      | Hollandale, WI      | 42.877445, -89.872223 | Illinois Basin |
| Eau Claire  | —     | <b>UPH-1-853</b>           | Cambrian      | Winslow, IL         | 42.504940, -89.852062 | Illinois Basin |
| Eau Claire  | —     | <b>UPH-1-977</b>           | Cambrian      | Winslow, IL         | 42.504940, -89.852062 | Illinois Basin |
| Mt. Simon   | —     | <b>UPH-1-1363</b>          | Cambrian      | Winslow, IL         | 42.504940, -89.852062 | Illinois Basin |

Table S2

| Age:            | Cambrian    |            |            | Camb. - Ordo. | Ordovician |            |          | Devonian - Mississippian |             |        | Mississippian |        |           |
|-----------------|-------------|------------|------------|---------------|------------|------------|----------|--------------------------|-------------|--------|---------------|--------|-----------|
| Shale Unit:     | Tunnel City | Mt. Simon  | Eau Claire | Collier       | Mazarn     | Polk Creek | Womble   | New Albany               | Chattanooga |        | Fayetteville  |        | Stanley   |
| Sample ID:      | UPH 1-658   | UPH 1-1363 | UPH 1-977  | CS1           | Mazarn 4   | PC1        | Womble 1 | Ceja Morris #1           | CS9         | CS10B  | FS2U          | FS10L  | Stanley 4 |
| Fluorapatite    | 1.29%       | 0.21%      | 0.80%      | 0.76%         | 0.02%      | 1.76%      | 0.88%    | 0.61%                    | 1.40%       | 0.74%  | 0.40%         | 0.31%  | 0.98%     |
| Goethite        | 0.05%       | 0.18%      | 0.00%      | 0.00%         | 0.03%      | 0.00%      | 0.00%    | 0.23%                    | 0.00%       | 0.00%  | 0.00%         | 0.00%  | 0.00%     |
| Schorl          | 2.53%       | 0.88%      | 3.20%      | 0.29%         | 0.26%      | 1.57%      | 0.39%    | 0.71%                    | 0.88%       | 1.61%  | 0.00%         | 2.26%  | 1.52%     |
| Pyrite          | 1.00%       | 0.20%      | 0.65%      | 0.91%         | 0.08%      | 0.79%      | 0.57%    | 2.08%                    | 1.16%       | 1.97%  | 1.50%         | 0.46%  | 0.42%     |
| Quartz          | 0.00%       | 32.59%     | 4.62%      | 58.80%        | 89.78%     | 28.94%     | 27.44%   | 30.83%                   | 27.99%      | 23.83% | 23.80%        | 28.47% | 34.56%    |
| Rutile          | 1.09%       | 0.73%      | 1.71%      | 0.94%         | 0.15%      | 1.36%      | 2.17%    | 0.95%                    | 1.40%       | 1.09%  | 2.30%         | 1.24%  | 1.21%     |
| Siderite        | 0.00%       | 0.32%      | 0.59%      | 0.10%         | 0.12%      | 1.24%      | 0.77%    | 0.09%                    | 0.77%       | 0.56%  | 0.84%         | 0.37%  | 6.27%     |
| Feldspars       | 50.35%      | 14.36%     | 45.47%     | 4.38%         | 3.24%      | 18.97%     | 15.95%   | 15.67%                   | 15.20%      | 10.21% | 13.02%        | 10.81% | 10.95%    |
| Albite          | 0.00%       | 4.94%      | 0.00%      | 0.00%         | 0.34%      | 0.00%      | 0.00%    | 2.32%                    | 0.73%       | 2.65%  | 0.00%         | 0.84%  | 0.52%     |
| Andesine        | 0.55%       | 0.00%      | 0.00%      | 0.00%         | 0.00%      | 0.00%      | 0.00%    | 0.00%                    | 0.00%       | 0.00%  | 0.00%         | 0.00%  | 0.00%     |
| Anorthite       | 1.93%       | 0.59%      | 3.58%      | 0.95%         | 1.42%      | 8.07%      | 1.37%    | 4.13%                    | 4.40%       | 0.71%  | 6.20%         | 1.35%  | 4.66%     |
| Bytownite       | 0.97%       | 0.34%      | 3.86%      | 0.00%         | 0.00%      | 2.07%      | 5.52%    | 0.76%                    | 1.00%       | 0.00%  | 0.00%         | 2.33%  | 1.21%     |
| Labradorite     | 0.00%       | 2.66%      | 0.00%      | 0.00%         | 0.00%      | 3.31%      | 3.07%    | 0.00%                    | 0.00%       | 0.00%  | 2.50%         | 0.00%  | 1.30%     |
| Microcline      | 23.00%      | 1.79%      | 18.30%     | 0.63%         | 0.55%      | 1.90%      | 4.99%    | 1.75%                    | 4.03%       | 4.11%  | 0.00%         | 3.66%  | 1.94%     |
| Oligoclase      | 2.29%       | 1.40%      | 1.54%      | 0.61%         | 0.50%      | 2.05%      | 0.00%    | 1.18%                    | 0.00%       | 0.55%  | 0.00%         | 0.92%  | 0.00%     |
| Orthoclase      | 18.10%      | 2.61%      | 15.10%     | 2.19%         | 0.22%      | 1.57%      | 1.00%    | 2.38%                    | 5.04%       | 1.11%  | 4.32%         | 1.71%  | 1.32%     |
| Sanidine        | 3.51%       | 0.03%      | 3.09%      | 0.00%         | 0.21%      | 0.00%      | 0.00%    | 3.15%                    | 0.00%       | 1.08%  | 0.00%         | 0.00%  | 0.00%     |
| Carbonates      | 1.67%       | 1.22%      | 1.70%      | 8.62%         | 0.39%      | 3.85%      | 2.24%    | 7.37%                    | 12.71%      | 2.44%  | 2.23%         | 1.60%  | 2.61%     |
| Ankerite        | 0.25%       | 0.17%      | 0.14%      | 0.57%         | 0.20%      | 1.97%      | 0.00%    | 1.36%                    | 0.51%       | 0.00%  | 0.38%         | 0.22%  | 0.94%     |
| Calcite         | 1.42%       | 0.18%      | 1.56%      | 7.67%         | 0.13%      | 0.92%      | 0.94%    | 1.00%                    | 1.19%       | 1.22%  | 1.26%         | 0.31%  | 0.83%     |
| Dolomite        | 0.00%       | 0.87%      | 0.00%      | 0.38%         | 0.06%      | 0.96%      | 1.30%    | 5.01%                    | 11.01%      | 1.22%  | 0.59%         | 1.07%  | 0.84%     |
| Phyllosilicates | 42.04%      | 49.35%     | 41.27%     | 25.18%        | 5.93%      | 41.53%     | 49.57%   | 41.48%                   | 38.51%      | 57.54% | 55.94%        | 54.46% | 41.52%    |
| Biotite         | 5.97%       | 1.16%      | 5.73%      | 6.12%         | 0.95%      | 3.86%      | 1.64%    | 3.15%                    | 3.83%       | 7.59%  | 1.68%         | 4.08%  | 1.64%     |
| Chamosite       | 0.85%       | 8.48%      | 0.44%      | 5.67%         | 0.00%      | 14.06%     | 9.89%    | 4.89%                    | 7.00%       | 0.83%  | 8.82%         | 2.39%  | 5.41%     |
| Chlorite        | 2.20%       | 4.36%      | 0.59%      | 9.57%         | 0.33%      | 5.63%      | 4.06%    | 0.99%                    | 2.28%       | 2.56%  | 2.00%         | 3.10%  | 1.38%     |
| Dickite         | 2.80%       | 1.14%      | 0.46%      | 1.42%         | 0.00%      | 2.98%      | 4.73%    | 1.64%                    | 1.71%       | 1.93%  | 12.94%        | 2.31%  | 4.09%     |
| Glauconite      | 7.66%       | 7.28%      | 7.53%      | 0.77%         | 1.26%      | 0.56%      | 4.88%    | 5.15%                    | 2.05%       | 6.51%  | 5.04%         | 6.32%  | 4.17%     |
| Illite          | 7.18%       | 2.43%      | 15.01%     | 0.00%         | 0.23%      | 0.00%      | 1.15%    | 2.50%                    | 4.00%       | 8.18%  | 2.00%         | 2.07%  | 3.12%     |
| Kaolinite       | 0.00%       | 1.74%      | 0.00%      | 0.78%         | 0.22%      | 6.19%      | 3.75%    | 1.16%                    | 1.74%       | 0.35%  | 1.96%         | 1.05%  | 6.31%     |
| Muscovite       | 15.38%      | 22.76%     | 11.51%     | 0.85%         | 2.94%      | 8.25%      | 19.47%   | 22.00%                   | 15.90%      | 29.59% | 21.50%        | 33.14% | 15.40%    |
| Total           | 100.02%     | 100.04%    | 100.01%    | 99.98%        | 100.00%    | 100.01%    | 99.98%   | 100.02%                  | 100.02%     | 99.99% | 100.03%       | 99.98% | 100.04%   |

Table S2

| Age:<br>Shale Unit:<br>Sample ID: | Pennsylvanian |        |          |        |           |            |           |                  |                |                     |                      |         |
|-----------------------------------|---------------|--------|----------|--------|-----------|------------|-----------|------------------|----------------|---------------------|----------------------|---------|
|                                   | Atoka         |        | Jackfork |        | Eudora    | Excello    | Heebner   | Hushpuckney      | Little Osage   |                     | Muncie Creek         | Stark   |
|                                   | LA1Sh         | UA1Sh  | LJ1      | UJ1Sh  | 21 Eudora | 17 Excello | 9 Heebner | 8<br>Husphuckney | 3 Little Osage | 16A Little<br>Osage | 11-1 Muncie<br>Creek | 2 Stark |
| Fluorapatite                      | 2.45%         | 2.21%  | 0.84%    | 0.70%  | 0.19%     | 0.00%      | 0.19%     | 0.00%            | 0.29%          | 0.26%               | 0.54%                | 19.80%  |
| Goethite                          | 1.88%         | 0.00%  | 0.16%    | 0.10%  | 0.00%     | 0.00%      | 0.00%     | 0.41%            | 0.00%          | 0.33%               | 0.14%                | 0.14%   |
| Schorl                            | 1.81%         | 2.96%  | 1.41%    | 1.39%  | 0.33%     | 2.01%      | 0.70%     | 0.52%            | 0.63%          | 0.89%               | 1.31%                | 1.60%   |
| Pyrite                            | 0.74%         | 0.72%  | 0.34%    | 0.42%  | 1.40%     | 0.24%      | 2.74%     | 1.76%            | 0.50%          | 0.06%               | 0.65%                | 1.68%   |
| Quartz                            | 31.62%        | 32.82% | 35.74%   | 9.13%  | 26.63%    | 25.21%     | 24.79%    | 29.25%           | 27.39%         | 21.59%              | 32.27%               | 42.00%  |
| Rutile                            | 2.60%         | 1.60%  | 0.25%    | 1.50%  | 1.11%     | 1.13%      | 1.18%     | 1.67%            | 1.70%          | 0.99%               | 1.06%                | 0.20%   |
| Siderite                          | 0.62%         | 0.49%  | 0.22%    | 0.00%  | 0.29%     | 0.00%      | 0.26%     | 0.36%            | 0.00%          | 0.17%               | 0.47%                | 0.00%   |
| Feldspars                         | 11.57%        | 8.90%  | 18.47%   | 46.17% | 16.94%    | 14.64%     | 16.12%    | 14.73%           | 24.62%         | 12.17%              | 17.39%               | 9.00%   |
| Albite                            | 0.00%         | 0.00%  | 4.29%    | 0.00%  | 4.34%     | 1.32%      | 0.80%     | 2.36%            | 3.80%          | 1.74%               | 3.11%                | 1.00%   |
| Andesine                          | 0.00%         | 0.00%  | 0.00%    | 1.26%  | 0.00%     | 0.00%      | 0.00%     | 0.00%            | 0.00%          | 0.00%               | 2.50%                | 0.70%   |
| Anorthite                         | 5.96%         | 5.05%  | 1.34%    | 4.31%  | 1.98%     | 1.91%      | 3.42%     | 1.22%            | 8.30%          | 0.00%               | 2.95%                | 0.90%   |
| Bytownite                         | 2.24%         | 2.51%  | 1.20%    | 2.90%  | 0.00%     | 0.00%      | 1.88%     | 2.03%            | 1.59%          | 0.86%               | 1.26%                | 0.60%   |
| Labradorite                       | 0.00%         | 0.00%  | 2.96%    | 0.00%  | 4.46%     | 1.65%      | 1.23%     | 2.37%            | 1.13%          | 2.28%               | 3.00%                | 0.80%   |
| Microcline                        | 0.00%         | 1.34%  | 1.98%    | 16.80% | 1.67%     | 4.60%      | 2.67%     | 1.69%            | 5.00%          | 1.10%               | 1.33%                | 2.60%   |
| Oligoclase                        | 1.76%         | 0.00%  | 2.46%    | 0.00%  | 0.00%     | 1.97%      | 2.61%     | 0.00%            | 0.00%          | 1.37%               | 1.56%                | 0.90%   |
| Orthoclase                        | 1.25%         | 0.00%  | 2.92%    | 12.80% | 4.49%     | 3.19%      | 3.51%     | 2.56%            | 4.80%          | 0.97%               | 1.68%                | 1.10%   |
| Sanidine                          | 0.36%         | 0.00%  | 1.32%    | 8.10%  | 0.00%     | 0.00%      | 0.00%     | 2.50%            | 0.00%          | 3.85%               | 0.00%                | 0.40%   |
| Carbonates                        | 6.10%         | 6.08%  | 12.18%   | 16.07% | 11.56%    | 1.51%      | 7.53%     | 0.50%            | 0.70%          | 10.69%              | 1.80%                | 0.34%   |
| Ankerite                          | 0.52%         | 0.69%  | 0.98%    | 1.16%  | 2.11%     | 0.22%      | 0.00%     | 0.00%            | 0.00%          | 0.98%               | 0.82%                | 0.04%   |
| Calcite                           | 4.22%         | 4.13%  | 0.28%    | 1.20%  | 6.52%     | 1.29%      | 4.52%     | 0.50%            | 0.30%          | 1.14%               | 0.98%                | 0.30%   |
| Dolomite                          | 1.36%         | 1.26%  | 10.92%   | 13.71% | 2.93%     | 0.00%      | 3.01%     | 0.00%            | 0.40%          | 8.57%               | 0.00%                | 0.00%   |
| Phyllosilicates                   | 40.62%        | 44.21% | 30.38%   | 24.49% | 41.58%    | 55.30%     | 46.46%    | 50.76%           | 44.26%         | 52.87%              | 44.36%               | 25.30%  |
| Biotite                           | 3.99%         | 1.29%  | 1.92%    | 2.10%  | 1.62%     | 11.20%     | 0.93%     | 7.00%            | 5.38%          | 8.85%               | 5.63%                | 3.50%   |
| Chamosite                         | 4.11%         | 13.00% | 11.84%   | 0.00%  | 9.51%     | 0.00%      | 4.98%     | 2.10%            | 1.00%          | 2.06%               | 1.53%                | 0.30%   |
| Chlorite                          | 1.22%         | 3.42%  | 6.27%    | 0.80%  | 0.96%     | 2.55%      | 3.75%     | 4.38%            | 2.09%          | 2.57%               | 2.90%                | 1.50%   |
| Dickite                           | 1.94%         | 1.80%  | 1.40%    | 1.74%  | 3.09%     | 2.67%      | 2.23%     | 1.30%            | 0.71%          | 3.60%               | 1.39%                | 0.00%   |
| Glauconite                        | 6.09%         | 3.82%  | 1.28%    | 5.48%  | 3.63%     | 6.37%      | 5.57%     | 7.51%            | 5.68%          | 6.77%               | 4.98%                | 5.00%   |
| Illite                            | 4.52%         | 2.78%  | 1.47%    | 5.99%  | 2.50%     | 5.41%      | 2.40%     | 3.80%            | 6.40%          | 7.66%               | 4.20%                | 4.90%   |
| Kaolinite                         | 4.05%         | 3.78%  | 1.88%    | 0.92%  | 1.37%     | 0.80%      | 1.10%     | 1.37%            | 0.00%          | 1.32%               | 0.83%                | 1.30%   |
| Muscovite                         | 14.70%        | 14.32% | 4.32%    | 7.46%  | 18.90%    | 26.30%     | 25.50%    | 23.30%           | 23.00%         | 20.04%              | 22.90%               | 8.80%   |
| Total                             | 100.01%       | 99.99% | 99.99%   | 99.97% | 100.03%   | 100.04%    | 99.97%    | 99.96%           | 100.09%        | 100.02%             | 99.99%               | 60.28%  |

Table S3

| Shale Name   | Sample ID         | Age           | P<br>(ppm) | Sc<br>(ppm) | Rb<br>(ppm) | Sr<br>(ppm) | Y<br>(ppm) | La<br>(ppm) | Ce<br>(ppm) | Pr<br>(ppm) | Eu<br>(ppm) | Gd<br>(ppm) | Tb<br>(ppm) | Dy<br>(ppm) | Ho<br>(ppm) | Er<br>(ppm) | Tm<br>(ppm) | Yb<br>(ppm) | Lu<br>(ppm) |
|--------------|-------------------|---------------|------------|-------------|-------------|-------------|------------|-------------|-------------|-------------|-------------|-------------|-------------|-------------|-------------|-------------|-------------|-------------|-------------|
| Heebner      | 9 Heebner         | Pennsylvanian | 1055.12    | 13.77       | 93.71       | 78.73       | 9.72       | 16.40       | 25.59       | 2.92        | 0.39        | 1.56        | 0.24        | 1.48        | 0.33        | 1.08        | 0.19        | 1.44        | 0.24        |
| Heebner      | 13 Heebner        | Pennsylvanian | 664.40     | 13.29       | 90.46       | 142.91      | 24.99      | 29.02       | 53.67       | 6.30        | 1.02        | 4.47        | 0.67        | 4.01        | 0.82        | 2.43        | 0.36        | 2.36        | 0.35        |
| Heeber       | 13 Heebner (R)    | Pennsylvanian | 687.46     | 14.50       | 102.70      | 160.55      | 28.15      | 32.53       | 60.59       | 7.10        | 1.14        | 4.92        | 0.75        | 4.48        | 0.93        | 2.71        | 0.38        | 2.55        | 0.39        |
| Eudora       | 15 Eudora         | Pennsylvanian | 5172.00    | 12.23       | 81.60       | 91.97       | 35.55      | 37.25       | 65.69       | 8.70        | 1.41        | 6.42        | 0.94        | 5.32        | 1.07        | 2.95        | 0.39        | 2.34        | 0.36        |
| Eudora       | 21 Eudora         | Pennsylvanian | 331.10     | 12.90       | 78.73       | 114.87      | 10.25      | 21.04       | 31.76       | 3.20        | 0.38        | 1.58        | 0.25        | 1.59        | 0.36        | 1.15        | 0.19        | 1.39        | 0.21        |
| Vilas        | 15 Vilas          | Pennsylvanian | 1171.33    | 12.69       | 104.48      | 225.85      | 21.82      | 30.70       | 63.46       | 6.43        | 0.98        | 4.33        | 0.64        | 3.64        | 0.71        | 1.98        | 0.28        | 1.73        | 0.25        |
| Muncie Creek | 11-1 Muncie Creek | Pennsylvanian | 1050.99    | 13.19       | 88.16       | 59.29       | 14.14      | 18.62       | 36.46       | 4.23        | 0.63        | 2.61        | 0.41        | 2.46        | 0.52        | 1.64        | 0.25        | 1.81        | 0.27        |
| Muncie Creek | 11-2 Muncie Creek | Pennsylvanian | 399.29     | 11.81       | 79.01       | 57.88       | 11.00      | 14.84       | 28.05       | 3.02        | 0.44        | 1.81        | 0.30        | 1.87        | 0.43        | 1.37        | 0.22        | 1.62        | 0.25        |
| Stark        | 2 Stark           | Pennsylvanian | 35350.74   | 9.79        | 69.88       | 390.10      | 106.68     | 90.69       | 132.54      | 19.42       | 3.11        | 15.34       | 2.21        | 12.76       | 2.67        | 7.33        | 0.92        | 5.20        | 0.75        |
| Hushpuckney  | 5 Hushpuckney     | Pennsylvanian | 977.36     | 16.98       | 123.28      | 80.32       | 17.50      | 27.85       | 48.85       | 5.13        | 0.72        | 3.14        | 0.49        | 2.97        | 0.65        | 2.03        | 0.32        | 2.18        | 0.34        |
| Hushpuckney  | 6 Hushpuckney     | Pennsylvanian | 14764.55   | 13.32       | 91.00       | 297.09      | 58.29      | 49.55       | 92.36       | 12.35       | 2.10        | 9.76        | 1.44        | 8.07        | 1.61        | 4.43        | 0.57        | 3.56        | 0.53        |
| Hushpuckney  | 8 Hushpuckney     | Pennsylvanian | 981.47     | 10.69       | 72.03       | 61.52       | 6.39       | 8.17        | 13.39       | 1.50        | 0.21        | 0.83        | 0.13        | 0.88        | 0.21        | 0.74        | 0.13        | 1.01        | 0.16        |
| Hushpuckney  | 20 Hushpuckney    | Pennsylvanian | 4068.78    | 13.89       | 102.30      | 104.25      | 22.01      | 25.62       | 44.37       | 5.37        | 0.83        | 3.62        | 0.53        | 3.19        | 0.66        | 1.96        | 0.29        | 1.92        | 0.30        |
| Hushpuckney  | 8 Hushpuckney (D) | Pennsylvanian | 1699.24    | 10.67       | 68.67       | 68.59       | 9.04       | 9.41        | 16.15       | 1.87        | 0.26        | 1.13        | 0.18        | 1.19        | 0.28        | 0.93        | 0.16        | 1.17        | 0.19        |
| Little Osage | 3 Little Osage    | Pennsylvanian | 700.49     | 12.29       | 90.08       | 106.86      | 9.25       | 18.28       | 29.63       | 3.01        | 0.41        | 1.62        | 0.26        | 1.59        | 0.34        | 1.12        | 0.18        | 1.35        | 0.21        |
| Little Osage | 16A Little Osage  | Pennsylvanian | 728.26     | 16.68       | 109.10      | 87.95       | 14.71      | 34.24       | 43.78       | 4.33        | 0.55        | 2.29        | 0.35        | 2.18        | 0.48        | 1.58        | 0.26        | 1.93        | 0.29        |
| Excello      | 1 Excello         | Pennsylvanian | 202.70     | 16.60       | 112.86      | 59.64       | 6.06       | 18.37       | 26.85       | 2.37        | 0.22        | 0.77        | 0.12        | 0.87        | 0.23        | 0.85        | 0.17        | 1.35        | 0.22        |
| Excello      | 17 Excello        | Pennsylvanian | 634.42     | 15.46       | 111.24      | 94.78       | 7.14       | 21.25       | 28.71       | 2.85        | 0.32        | 1.24        | 0.18        | 1.08        | 0.24        | 0.82        | 0.15        | 1.27        | 0.20        |
| Excello      | 19 Excello        | Pennsylvanian | 672.95     | 13.06       | 91.45       | 49.32       | 7.85       | 15.42       | 20.73       | 2.08        | 0.26        | 1.04        | 0.17        | 1.09        | 0.26        | 0.91        | 0.16        | 1.29        | 0.20        |
| Atoka        | UA1Sh             | Pennsylvanian | 651.92     | 9.96        | 60.75       | 74.87       | 23.95      | 25.36       | 41.70       | 6.42        | 1.07        | 4.81        | 0.68        | 3.51        | 0.71        | 2.08        | 0.31        | 2.11        | 0.33        |
| Atoka        | LA1Sh             | Pennsylvanian | 504.33     | 11.10       | 80.36       | 57.17       | 14.72      | 16.51       | 34.38       | 4.94        | 0.98        | 3.67        | 0.50        | 2.53        | 0.53        | 1.65        | 0.24        | 1.74        | 0.27        |
| Atoka        | LA2Sh             | Pennsylvanian | 597.75     | 14.98       | 107.45      | 66.67       | 27.90      | 29.40       | 58.84       | 7.44        | 1.40        | 5.93        | 0.77        | 3.48        | 0.68        | 2.00        | 0.28        | 1.97        | 0.30        |
| Atoka        | LA2Sh (D)         | Pennsylvanian | 617.23     | 14.99       | 106.38      | 67.01       | 27.92      | 30.33       | 60.82       | 7.57        | 1.42        | 6.16        | 0.79        | 3.66        | 0.71        | 2.13        | 0.30        | 2.06        | 0.31        |
| Atoka        | Atoka 2           | Pennsylvanian | 570.47     | 12.92       | 84.88       | 66.19       | 23.24      | 25.87       | 51.01       | 6.53        | 1.21        | 5.09        | 0.67        | 3.13        | 0.62        | 1.83        | 0.26        | 1.82        | 0.27        |
| Jackfork     | UJ1Sh             | Pennsylvanian | 466.57     | 16.54       | 85.28       | 54.55       | 29.78      | 33.80       | 72.44       | 8.35        | 1.36        | 6.41        | 0.85        | 4.05        | 0.80        | 2.33        | 0.33        | 2.26        | 0.35        |
| Jackfork     | UJ2Sh             | Pennsylvanian | 342.04     | 9.45        | 73.53       | 81.09       | 24.94      | 28.47       | 59.53       | 7.48        | 1.31        | 5.95        | 0.82        | 4.03        | 0.81        | 2.41        | 0.34        | 2.33        | 0.36        |
| Jackfork     | MJ1               | Pennsylvanian | 449.40     | 18.59       | 161.13      | 64.51       | 37.07      | 39.90       | 84.45       | 9.74        | 1.69        | 7.40        | 0.98        | 4.72        | 0.93        | 2.80        | 0.38        | 2.66        | 0.40        |
| Jackfork     | MJ2               | Pennsylvanian | 545.31     | 13.97       | 101.85      | 43.47       | 27.13      | 30.49       | 63.67       | 7.56        | 1.28        | 5.80        | 0.78        | 3.79        | 0.75        | 2.20        | 0.31        | 2.13        | 0.32        |
| Jackfork     | LJ1               | Pennsylvanian | 471.98     | 4.48        | 76.06       | 31.02       | 17.04      | 14.24       | 27.92       | 3.59        | 0.72        | 3.41        | 0.53        | 2.90        | 0.60        | 1.76        | 0.25        | 1.70        | 0.26        |
| Fayetteville | FS1L              | Mississippian | 2544.67    | 17.28       | 146.50      | 109.59      | 54.85      | 56.17       | 67.41       | 11.66       | 2.07        | 9.95        | 1.44        | 8.16        | 1.67        | 4.67        | 0.60        | 3.85        | 0.56        |
| Fayetteville | FS2U              | Mississippian | 358.98     | 20.78       | 149.39      | 127.44      | 25.63      | 41.94       | 81.25       | 8.62        | 1.05        | 4.29        | 0.67        | 4.20        | 0.89        | 2.67        | 0.39        | 2.53        | 0.37        |
| Fayetteville | FS3               | Mississippian | 2672.07    | 19.42       | 116.64      | 137.74      | 42.86      | 47.03       | 63.70       | 9.69        | 1.71        | 7.41        | 1.05        | 6.01        | 1.23        | 3.47        | 0.46        | 2.94        | 0.44        |
| Fayetteville | FS4               | Mississippian | 254.26     | 16.98       | 113.34      | 91.54       | 17.51      | 32.56       | 59.58       | 7.06        | 0.81        | 3.18        | 0.52        | 3.24        | 0.68        | 2.10        | 0.31        | 2.00        | 0.29        |
| Fayetteville | FS6L              | Mississippian | 2114.92    | 17.72       | 117.47      | 242.84      | 42.69      | 39.60       | 64.78       | 8.71        | 1.50        | 6.71        | 0.99        | 5.99        | 1.27        | 3.56        | 0.49        | 3.08        | 0.45        |
| Fayetteville | FS7L              | Mississippian | 711.62     | 19.07       | 147.94      | 100.48      | 29.61      | 52.28       | 77.16       | 10.54       | 1.14        | 4.77        | 0.74        | 4.56        | 0.98        | 3.03        | 0.44        | 3.01        | 0.45        |
| Fayetteville | FS8UU             | Mississippian | 308.51     | 8.96        | 21.92       | 53.09       | 23.36      | 17.54       | 41.73       | 4.88        | 1.03        | 4.50        | 0.71        | 4.08        | 0.83        | 2.31        | 0.32        | 2.08        | 0.31        |
| Fayetteville | FS9LU             | Mississippian | 406.28     | 11.14       | 46.70       | 117.31      | 33.89      | 29.78       | 63.65       | 7.02        | 1.30        | 5.84        | 0.94        | 5.50        | 1.13        | 3.17        | 0.44        | 2.74        | 0.42        |
| Fayetteville | FS10L             | Mississippian | 592.50     | 21.05       | 140.03      | 120.42      | 37.05      | 55.27       | 113.43      | 11.84       | 1.57        | 6.89        | 1.07        | 6.34        | 1.29        | 3.81        | 0.54        | 3.48        | 0.52        |
| Fayetteville | FS11              | Mississippian | 10231.88   | 15.73       | 116.00      | 195.08      | 192.94     | 75.66       | 87.43       | 14.88       | 3.28        | 17.55       | 2.56        | 16.50       | 3.85        | 10.97       | 1.33        | 7.51        | 1.15        |
| Stanley      | Stanley 1         | Mississippian | 617.98     | 12.27       | 99.29       | 44.03       | 25.99      | 27.73       | 53.71       | 6.82        | 1.25        | 5.62        | 0.78        | 3.86        | 0.73        | 2.16        | 0.30        | 2.06        | 0.31        |
| Stanley      | Stanley 2         | Mississippian | 359.30     | 5.70        | 48.33       | 38.05       | 19.23      | 21.93       | 45.15       | 5.45        | 0.92        | 4.33        | 0.63        | 3.56        | 0.73        | 2.14        | 0.31        | 2.03        | 0.31        |

Table S3

|             |                         |               |         |       |        |        |       |       |        |       |      |      |      |      |      |      |      |      |      |
|-------------|-------------------------|---------------|---------|-------|--------|--------|-------|-------|--------|-------|------|------|------|------|------|------|------|------|------|
| Stanley     | Stanley 3               | Mississippian | 545.46  | 11.23 | 74.02  | 33.96  | 12.47 | 18.29 | 37.83  | 4.49  | 0.80 | 3.26 | 0.47 | 2.42 | 0.49 | 1.51 | 0.22 | 1.55 | 0.24 |
| Stanley     | Stanley 4               | Mississippian | 891.14  | 20.00 | 162.71 | 111.54 | 38.01 | 56.31 | 117.43 | 12.27 | 1.73 | 7.76 | 1.19 | 6.97 | 1.35 | 3.79 | 0.53 | 3.34 | 0.49 |
| Stanley     | Stanley 4 (D)           | Mississippian | 646.06  | 12.33 | 95.22  | 70.86  | 24.19 | 29.50 | 57.91  | 7.41  | 1.26 | 5.78 | 0.80 | 3.83 | 0.76 | 2.17 | 0.30 | 2.02 | 0.30 |
| Chattanooga | CS1 (Chattanooga)       | Devonian      | 398.08  | 16.03 | 171.39 | 45.99  | 33.80 | 37.20 | 71.45  | 8.19  | 1.37 | 5.96 | 0.90 | 5.49 | 1.12 | 3.17 | 0.44 | 2.77 | 0.41 |
| Chattanooga | CS2                     | Devonian      | 419.00  | 13.86 | 143.61 | 43.88  | 32.26 | 40.07 | 80.23  | 9.16  | 1.39 | 6.41 | 0.99 | 5.95 | 1.24 | 3.59 | 0.51 | 3.26 | 0.48 |
| Chattanooga | CS3                     | Devonian      | 206.49  | 12.68 | 127.44 | 43.36  | 25.36 | 31.35 | 64.80  | 7.01  | 1.04 | 4.62 | 0.73 | 4.49 | 0.94 | 2.78 | 0.41 | 2.59 | 0.39 |
| Chattanooga | CS4                     | Devonian      | 364.70  | 13.82 | 129.93 | 39.25  | 33.17 | 40.84 | 83.76  | 9.06  | 1.33 | 5.99 | 0.95 | 5.80 | 1.21 | 3.50 | 0.50 | 3.16 | 0.47 |
| Chattanooga | CS5                     | Devonian      | 341.64  | 15.33 | 142.21 | 42.29  | 30.93 | 40.50 | 83.10  | 8.95  | 1.25 | 5.50 | 0.87 | 5.40 | 1.14 | 3.41 | 0.48 | 3.10 | 0.46 |
| Chattanooga | CS6                     | Devonian      | 2260.37 | 15.97 | 147.26 | 63.77  | 42.16 | 45.60 | 94.83  | 11.70 | 1.98 | 9.21 | 1.33 | 7.42 | 1.45 | 3.87 | 0.52 | 3.24 | 0.47 |
| Chattanooga | CS7                     | Devonian      | 236.90  | 19.48 | 189.53 | 55.52  | 25.78 | 35.17 | 72.97  | 7.84  | 1.16 | 4.85 | 0.74 | 4.50 | 0.93 | 2.66 | 0.38 | 2.49 | 0.37 |
| Chattanooga | CS7 (R)                 | Devonian      | 260.41  | 19.83 | 195.75 | 57.82  | 26.63 | 36.87 | 76.09  | 8.23  | 1.21 | 4.99 | 0.77 | 4.58 | 0.96 | 2.80 | 0.40 | 2.56 | 0.37 |
| Chattanooga | CS8                     | Devonian      | 214.76  | 20.06 | 179.92 | 56.56  | 27.90 | 42.33 | 88.67  | 9.02  | 1.22 | 5.22 | 0.83 | 4.98 | 1.03 | 3.03 | 0.44 | 2.83 | 0.42 |
| Chattanooga | CS9                     | Devonian      | 207.76  | 18.57 | 165.85 | 60.09  | 30.77 | 42.72 | 90.41  | 9.46  | 1.27 | 5.44 | 0.88 | 5.31 | 1.12 | 3.26 | 0.47 | 3.02 | 0.44 |
| Chattanooga | CS10B                   | Devonian      | 163.81  | 23.19 | 225.61 | 58.27  | 22.22 | 47.52 | 95.03  | 8.98  | 0.86 | 3.71 | 0.63 | 4.10 | 0.89 | 2.76 | 0.41 | 2.73 | 0.40 |
| Chattanooga | CS11                    | Devonian      | 206.41  | 21.44 | 197.34 | 58.87  | 30.32 | 44.92 | 97.42  | 9.95  | 1.35 | 5.84 | 0.92 | 5.49 | 1.13 | 3.30 | 0.47 | 3.07 | 0.46 |
| Chattanooga | CS12                    | Devonian      | 206.92  | 23.01 | 211.56 | 63.04  | 30.37 | 45.01 | 96.66  | 10.10 | 1.38 | 5.77 | 0.91 | 5.37 | 1.13 | 3.29 | 0.47 | 3.02 | 0.47 |
| Chattanooga | CS13                    | Devonian      | 122.72  | 17.74 | 152.15 | 55.13  | 31.45 | 43.34 | 93.21  | 9.69  | 1.31 | 5.82 | 0.92 | 5.59 | 1.18 | 3.45 | 0.50 | 3.23 | 0.48 |
| New Albany  | Ceja Corp Morris #1     | Devonian      | 205.28  | 11.53 | 78.36  | 46.64  | 19.37 | 21.06 | 38.25  | 5.20  | 0.92 | 4.12 | 0.58 | 2.99 | 0.61 | 1.85 | 0.26 | 1.76 | 0.27 |
| New Albany  | Ceja Corp Morris #1 (R) | Devonian      | 199.76  | 10.94 | 75.08  | 44.89  | 18.71 | 20.05 | 36.52  | 4.82  | 0.86 | 3.85 | 0.55 | 2.81 | 0.56 | 1.69 | 0.24 | 1.68 | 0.25 |
| Polk Creek  | Polk Creek 1            | Ordovician    | 17.09   | 3.29  | 21.59  | 3.09   | 4.94  | 5.37  | 10.60  | 1.39  | 0.29 | 1.07 | 0.16 | 0.97 | 0.22 | 0.70 | 0.11 | 0.88 | 0.14 |
| Polk Creek  | Polk Creek 1 (D)        | Ordovician    | 17.17   | 3.59  | 24.17  | 3.28   | 5.22  | 5.43  | 11.15  | 1.41  | 0.30 | 1.12 | 0.17 | 1.01 | 0.22 | 0.72 | 0.12 | 0.92 | 0.15 |
| Polk Creek  | PC1                     | Ordovician    | 157.52  | 2.77  | 16.54  | 9.83   | 8.04  | 5.55  | 10.57  | 1.35  | 0.27 | 1.17 | 0.18 | 1.10 | 0.26 | 0.82 | 0.13 | 0.88 | 0.15 |
| Polk Creek  | PC1 (R)                 | Ordovician    | 149.64  | 2.79  | 16.61  | 9.83   | 8.13  | 5.63  | 10.66  | 1.36  | 0.27 | 1.18 | 0.18 | 1.11 | 0.26 | 0.85 | 0.13 | 0.91 | 0.15 |
| Womble      | Womble 1                | Ordovician    | 162.23  | 15.92 | 161.76 | 25.70  | 13.26 | 35.07 | 65.77  | 6.99  | 0.81 | 2.75 | 0.40 | 2.29 | 0.47 | 1.41 | 0.22 | 1.44 | 0.22 |
| Womble      | Womble 2                | Ordovician    | 25.22   | 1.90  | 15.36  | 4.15   | 1.83  | 5.73  | 11.09  | 1.34  | 0.20 | 0.75 | 0.08 | 0.38 | 0.08 | 0.27 | 0.04 | 0.33 | 0.06 |
| Womble      | Womble 3                | Ordovician    | 25.12   | 1.88  | 15.44  | 4.04   | 2.63  | 6.13  | 11.77  | 1.41  | 0.21 | 0.79 | 0.09 | 0.47 | 0.10 | 0.33 | 0.05 | 0.38 | 0.06 |
| Womble      | Womble 3 (D)            | Ordovician    | 290.89  | 11.61 | 50.69  | 15.38  | 31.44 | 33.39 | 61.15  | 7.63  | 1.47 | 6.31 | 0.89 | 4.44 | 0.90 | 2.47 | 0.32 | 2.07 | 0.32 |
| Mazarn      | Mazarn 1                | Ordovician    | 142.57  | 3.26  | 27.91  | 28.63  | 3.97  | 5.85  | 12.65  | 1.41  | 0.23 | 1.04 | 0.15 | 0.83 | 0.17 | 0.51 | 0.08 | 0.52 | 0.08 |
| Mazarn      | Mazarn 2                | Ordovician    | 286.23  | 8.20  | 66.39  | 72.36  | 7.82  | 8.25  | 14.99  | 1.93  | 0.43 | 1.53 | 0.23 | 1.24 | 0.26 | 0.83 | 0.13 | 0.89 | 0.14 |
| Mazarn      | Mazarn 3                | Ordovician    | 42.01   | 2.17  | 7.05   | 345.44 | 2.70  | 4.33  | 8.73   | 0.96  | 0.18 | 0.76 | 0.09 | 0.36 | 0.06 | 0.19 | 0.02 | 0.16 | 0.02 |
| Mazarn      | Mazarn 4                | Ordovician    | 359.76  | 8.34  | 76.94  | 39.20  | 10.55 | 13.86 | 28.03  | 3.15  | 0.66 | 2.51 | 0.35 | 1.77 | 0.36 | 1.07 | 0.16 | 1.07 | 0.17 |
| Collier     | Collier CS1             | Camb.-Ordo.   | 570.63  | 5.99  | 54.99  | 54.45  | 7.35  | 8.87  | 18.15  | 2.10  | 0.35 | 1.56 | 0.22 | 1.22 | 0.26 | 0.80 | 0.12 | 0.88 | 0.13 |
| Collier     | Collier CS1 (R)         | Camb.-Ordo.   | 578.91  | 6.06  | 56.11  | 55.57  | 7.38  | 8.92  | 18.30  | 2.11  | 0.35 | 1.56 | 0.22 | 1.20 | 0.26 | 0.80 | 0.12 | 0.88 | 0.13 |
| Tunnel City | UPH-1-658               | Cambrian      | 184.82  | 7.35  | 65.82  | 36.59  | 10.45 | 14.18 | 30.40  | 3.07  | 0.66 | 2.18 | 0.25 | 1.14 | 0.24 | 0.78 | 0.12 | 0.84 | 0.14 |
| Eau Claire  | HwyA-2-520              | Cambrian      | 536.98  | 7.80  | 44.66  | 47.64  | 7.36  | 14.87 | 26.00  | 2.60  | 0.51 | 1.98 | 0.23 | 0.94 | 0.19 | 0.58 | 0.09 | 0.65 | 0.11 |
| Eau Claire  | UPH-1-853               | Cambrian      | 102.86  | 6.64  | 49.37  | 28.18  | 4.35  | 9.67  | 17.69  | 2.04  | 0.29 | 1.13 | 0.12 | 0.52 | 0.11 | 0.40 | 0.06 | 0.46 | 0.08 |
| Eau Claire  | UPH-1-977               | Cambrian      | 259.88  | 6.14  | 67.35  | 32.47  | 2.43  | 7.04  | 10.10  | 1.07  | 0.17 | 0.57 | 0.06 | 0.34 | 0.08 | 0.33 | 0.06 | 0.49 | 0.09 |
| Mt. Simon   | UPH-1-1363              | Cambrian      | 122.17  | 10.31 | 91.26  | 95.33  | 5.09  | 15.29 | 36.34  | 4.05  | 0.54 | 2.10 | 0.23 | 1.03 | 0.21 | 0.70 | 0.10 | 0.75 | 0.12 |

Table S4

| Shale Name   | Sample ID         | Age           | Standard Deviation (1σ) |          |          |          |         |          |          |          |          |          |          |          |          |          |          |          |          |          |          |
|--------------|-------------------|---------------|-------------------------|----------|----------|----------|---------|----------|----------|----------|----------|----------|----------|----------|----------|----------|----------|----------|----------|----------|----------|
|              |                   |               | P (ppb)                 | Sc (ppb) | Rb (ppb) | Sr (ppb) | Y (ppb) | La (ppb) | Ce (ppb) | Pr (ppb) | Nd (ppb) | Sm (ppb) | Eu (ppb) | Gd (ppb) | Tb (ppb) | Dy (ppb) | Ho (ppb) | Er (ppb) | Tm (ppb) | Yb (ppb) | Lu (ppb) |
| Heebner      | 9 Heebner         | Pennsylvanian | 61.187                  | 0.644    | 1.138    | 3.442    | 0.121   | 0.331    | 0.490    | 0.059    | 0.237    | 0.043    | 0.016    | 0.044    | 0.011    | 0.041    | 0.008    | 0.039    | 0.007    | 0.074    | 0.012    |
| Heebner      | 13 Heebner        | Pennsylvanian | 32.706                  | 0.814    | 2.160    | 3.008    | 0.465   | 0.912    | 0.702    | 0.114    | 0.612    | 0.190    | 0.027    | 0.166    | 0.024    | 0.103    | 0.030    | 0.035    | 0.008    | 0.034    | 0.009    |
| Heeber       | 13 Heebner (R)    | Pennsylvanian | 124.356                 | 0.278    | 2.236    | 3.288    | 0.599   | 1.301    | 1.934    | 0.111    | 0.526    | 0.134    | 0.030    | 0.157    | 0.027    | 0.069    | 0.035    | 0.032    | 0.006    | 0.100    | 0.011    |
| Eudora       | 15 Eudora         | Pennsylvanian | 89.727                  | 0.434    | 2.941    | 2.832    | 0.704   | 1.181    | 1.202    | 0.341    | 0.601    | 0.108    | 0.025    | 0.169    | 0.015    | 0.194    | 0.053    | 0.150    | 0.014    | 0.050    | 0.012    |
| Eudora       | 21 Eudora         | Pennsylvanian | 73.651                  | 0.525    | 1.579    | 4.630    | 0.264   | 0.538    | 0.223    | 0.050    | 0.353    | 0.063    | 0.009    | 0.038    | 0.012    | 0.019    | 0.011    | 0.031    | 0.005    | 0.034    | 0.006    |
| Vilas        | 15 Vilas          | Pennsylvanian | 72.686                  | 0.836    | 1.706    | 6.372    | 0.609   | 0.974    | 2.789    | 0.120    | 0.607    | 0.167    | 0.023    | 0.084    | 0.017    | 0.080    | 0.010    | 0.056    | 0.012    | 0.030    | 0.008    |
| Muncie Creek | 11-1 Muncie Creek | Pennsylvanian | 50.718                  | 0.321    | 2.092    | 2.341    | 0.327   | 0.712    | 1.210    | 0.096    | 0.318    | 0.132    | 0.022    | 0.068    | 0.012    | 0.102    | 0.012    | 0.051    | 0.007    | 0.028    | 0.012    |
| Muncie Creek | 11-2 Muncie Creek | Pennsylvanian | 40.443                  | 0.503    | 2.430    | 0.564    | 0.269   | 0.415    | 0.894    | 0.081    | 0.356    | 0.073    | 0.023    | 0.052    | 0.010    | 0.041    | 0.027    | 0.047    | 0.005    | 0.033    | 0.011    |
| Stark        | 2 Stark           | Pennsylvanian | 514.578                 | 0.496    | 2.021    | 16.851   | 2.100   | 3.513    | 4.506    | 0.523    | 3.567    | 0.406    | 0.105    | 0.325    | 0.019    | 0.386    | 0.103    | 0.110    | 0.028    | 0.236    | 0.037    |
| Hushpuckney  | 5 Hushpuckney     | Pennsylvanian | 129.446                 | 1.036    | 2.500    | 1.778    | 0.404   | 1.880    | 1.374    | 0.107    | 0.519    | 0.056    | 0.035    | 0.057    | 0.017    | 0.074    | 0.028    | 0.035    | 0.024    | 0.063    | 0.017    |
| Hushpuckney  | 6 Hushpuckney     | Pennsylvanian | 666.148                 | 0.693    | 1.019    | 9.253    | 1.096   | 1.511    | 2.581    | 0.234    | 1.166    | 0.346    | 0.041    | 0.355    | 0.024    | 0.257    | 0.055    | 0.158    | 0.023    | 0.163    | 0.017    |
| Hushpuckney  | 8 Hushpuckney     | Pennsylvanian | 113.489                 | 0.269    | 0.895    | 1.547    | 0.178   | 0.303    | 0.162    | 0.042    | 0.085    | 0.052    | 0.014    | 0.018    | 0.011    | 0.024    | 0.010    | 0.028    | 0.005    | 0.034    | 0.008    |
| Hushpuckney  | 8 Hushpuckney (D) | Pennsylvanian | 190.843                 | 0.549    | 2.913    | 1.275    | 0.113   | 0.217    | 1.174    | 0.042    | 0.200    | 0.047    | 0.006    | 0.029    | 0.007    | 0.039    | 0.007    | 0.036    | 0.002    | 0.036    | 0.005    |
| Hushpuckney  | 20 Hushpuckney    | Pennsylvanian | 185.027                 | 0.777    | 1.582    | 2.634    | 0.238   | 0.473    | 0.544    | 0.082    | 0.465    | 0.108    | 0.029    | 0.061    | 0.020    | 0.089    | 0.024    | 0.056    | 0.017    | 0.066    | 0.016    |
| Little Osage | 3 Little Osage    | Pennsylvanian | 102.437                 | 0.375    | 1.527    | 1.623    | 0.218   | 0.437    | 0.892    | 0.068    | 0.161    | 0.062    | 0.023    | 0.048    | 0.004    | 0.028    | 0.004    | 0.042    | 0.005    | 0.052    | 0.010    |
| Little Osage | 16A Little Osage  | Pennsylvanian | 52.340                  | 0.855    | 1.477    | 1.785    | 0.306   | 1.720    | 1.019    | 0.139    | 0.269    | 0.066    | 0.019    | 0.074    | 0.010    | 0.074    | 0.011    | 0.033    | 0.004    | 0.067    | 0.012    |
| Excello      | 1 Excello         | Pennsylvanian | 36.125                  | 0.604    | 1.919    | 1.293    | 0.077   | 0.574    | 0.648    | 0.055    | 0.222    | 0.040    | 0.013    | 0.017    | 0.007    | 0.066    | 0.004    | 0.041    | 0.006    | 0.022    | 0.008    |
| Excello      | 17 Excello        | Pennsylvanian | 93.894                  | 0.425    | 1.100    | 2.457    | 0.191   | 0.742    | 0.726    | 0.057    | 0.135    | 0.063    | 0.019    | 0.015    | 0.004    | 0.027    | 0.012    | 0.026    | 0.003    | 0.034    | 0.007    |
| Excello      | 19 Excello        | Pennsylvanian | 59.612                  | 0.856    | 1.819    | 1.474    | 0.311   | 0.234    | 0.586    | 0.042    | 0.269    | 0.051    | 0.013    | 0.061    | 0.004    | 0.026    | 0.019    | 0.021    | 0.009    | 0.051    | 0.008    |
| Atoka        | UA1Sh             | Pennsylvanian | 6.618                   | 0.936    | 5.414    | 1.272    | 0.573   | 1.157    | 3.647    | 0.266    | 1.135    | 0.208    | 0.064    | 0.223    | 0.021    | 0.205    | 0.016    | 0.185    | 0.012    | 0.081    | 0.009    |
| Atoka        | LA1Sh             | Pennsylvanian | 9.393                   | 0.324    | 1.059    | 1.706    | 0.400   | 0.394    | 0.945    | 0.232    | 0.438    | 0.114    | 0.038    | 0.159    | 0.033    | 0.063    | 0.019    | 0.076    | 0.008    | 0.065    | 0.004    |
| Atoka        | LA2Sh             | Pennsylvanian | 15.571                  | 0.372    | 3.182    | 1.663    | 0.861   | 0.652    | 3.119    | 0.265    | 1.441    | 0.142    | 0.062    | 0.275    | 0.054    | 0.074    | 0.015    | 0.049    | 0.012    | 0.032    | 0.015    |
| Atoka        | LA2Sh (D)         | Pennsylvanian | 5.243                   | 0.900    | 5.027    | 2.125    | 0.994   | 1.910    | 2.151    | 0.238    | 0.840    | 0.283    | 0.041    | 0.182    | 0.022    | 0.046    | 0.011    | 0.063    | 0.012    | 0.060    | 0.014    |
| Atoka        | Atoka 2           | Pennsylvanian | 7.677                   | 0.856    | 4.662    | 1.279    | 1.217   | 1.325    | 2.061    | 0.281    | 1.416    | 0.301    | 0.047    | 0.281    | 0.027    | 0.108    | 0.032    | 0.080    | 0.018    | 0.072    | 0.005    |
| Jackfork     | UJ1Sh             | Pennsylvanian | 6.154                   | 0.730    | 3.717    | 1.514    | 1.009   | 1.139    | 3.534    | 0.324    | 0.911    | 0.244    | 0.033    | 0.182    | 0.032    | 0.192    | 0.057    | 0.132    | 0.008    | 0.035    | 0.021    |
| Jackfork     | UJ2Sh             | Pennsylvanian | 4.617                   | 0.915    | 3.622    | 3.495    | 1.015   | 1.160    | 3.903    | 0.169    | 1.207    | 0.106    | 0.051    | 0.216    | 0.019    | 0.060    | 0.021    | 0.106    | 0.011    | 0.063    | 0.008    |
| Jackfork     | MJ1               | Pennsylvanian | 5.929                   | 0.784    | 3.405    | 1.701    | 1.084   | 1.069    | 2.157    | 0.287    | 2.123    | 0.247    | 0.028    | 0.325    | 0.026    | 0.229    | 0.019    | 0.053    | 0.005    | 0.100    | 0.017    |
| Jackfork     | MJ2               | Pennsylvanian | 8.310                   | 0.496    | 5.003    | 1.484    | 0.384   | 0.383    | 1.487    | 0.239    | 0.621    | 0.032    | 0.051    | 0.078    | 0.017    | 0.086    | 0.037    | 0.097    | 0.009    | 0.077    | 0.010    |
| Jackfork     | LJ1               | Pennsylvanian | 11.152                  | 0.672    | 2.206    | 3.999    | 1.180   | 1.802    | 3.194    | 0.380    | 1.462    | 0.251    | 0.052    | 0.378    | 0.036    | 0.125    | 0.054    | 0.078    | 0.012    | 0.085    | 0.018    |
| Fayetteville | FS1L              | Mississippian | 140.242                 | 0.773    | 3.807    | 3.940    | 1.354   | 1.153    | 2.036    | 0.277    | 0.852    | 0.305    | 0.062    | 0.304    | 0.033    | 0.214    | 0.042    | 0.086    | 0.018    | 0.085    | 0.027    |
| Fayetteville | FS2U              | Mississippian | 42.465                  | 0.739    | 5.708    | 2.323    | 0.842   | 0.448    | 3.368    | 0.173    | 0.939    | 0.072    | 0.014    | 0.089    | 0.013    | 0.055    | 0.012    | 0.098    | 0.009    | 0.115    | 0.005    |
| Fayetteville | FS3               | Mississippian | 180.901                 | 0.823    | 1.666    | 4.277    | 0.328   | 1.092    | 1.667    | 0.211    | 1.015    | 0.128    | 0.025    | 0.218    | 0.043    | 0.204    | 0.039    | 0.079    | 0.012    | 0.055    | 0.034    |
| Fayetteville | FS4               | Mississippian | 16.862                  | 0.241    | 3.848    | 3.087    | 0.321   | 0.698    | 2.444    | 0.157    | 0.646    | 0.039    | 0.041    | 0.051    | 0.009    | 0.124    | 0.018    | 0.041    | 0.016    | 0.063    | 0.006    |
| Fayetteville | FS6L              | Mississippian | 159.173                 | 0.411    | 3.348    | 4.476    | 1.069   | 1.357    | 1.722    | 0.214    | 0.276    | 0.093    | 0.029    | 0.192    | 0.030    | 0.108    | 0.025    | 0.079    | 0.018    | 0.087    | 0.014    |
| Fayetteville | FS7L              | Mississippian | 96.300                  | 0.779    | 3.731    | 2.475    | 0.196   | 0.633    | 2.720    | 0.067    | 1.390    | 0.128    | 0.038    | 0.117    | 0.007    | 0.069    | 0.007    | 0.141    | 0.014    | 0.066    | 0.012    |
| Fayetteville | FS8UU             | Mississippian | 65.457                  | 0.603    | 0.678    | 1.186    | 0.658   | 0.666    | 0.956    | 0.052    | 0.595    | 0.043    | 0.025    | 0.148    | 0.020    | 0.123    | 0.022    | 0.060    | 0.010    | 0.088    | 0.009    |
| Fayetteville | FS9LU             | Mississippian | 75.862                  | 0.573    | 0.926    | 1.087    | 0.460   | 1.093    | 1.584    | 0.101    | 0.606    | 0.268    | 0.047    | 0.218    | 0.029    | 0.094    | 0.034    | 0.164    | 0.026    | 0.088    | 0.011    |
| Fayetteville | FS10L             | Mississippian | 29.785                  | 0.583    | 4.087    | 3.027    | 1.184   | 1.159    | 2.789    | 0.286    | 0.940    | 0.085    | 0.014    | 0.118    | 0.012    | 0.208    | 0.024    | 0.088    | 0.010    | 0.068    | 0.017    |
| Fayetteville | FS11              | Mississippian | 471.638                 | 0.916    | 2.420    | 5.549    | 5.281   | 1.905    | 1.438    | 0.628    | 1.390    | 0.577    | 0.122    | 0.408    | 0.081    | 0.763    | 0.064    | 0.393    | 0.030    | 0.254    | 0.035    |



Table S4

|             |                         |               |         |       |       |       |       |       |       |       |       |       |       |       |       |       |       |       |       |       |       |
|-------------|-------------------------|---------------|---------|-------|-------|-------|-------|-------|-------|-------|-------|-------|-------|-------|-------|-------|-------|-------|-------|-------|-------|
| Stanley     | Stanley 1               | Mississippian | 7.691   | 0.481 | 6.674 | 1.087 | 0.756 | 0.804 | 2.464 | 0.296 | 0.505 | 0.138 | 0.041 | 0.231 | 0.018 | 0.133 | 0.018 | 0.056 | 0.011 | 0.058 | 0.009 |
| Stanley     | Stanley 2               | Mississippian | 9.253   | 0.331 | 5.339 | 2.470 | 1.142 | 1.778 | 4.317 | 0.560 | 1.582 | 0.200 | 0.064 | 0.254 | 0.032 | 0.158 | 0.058 | 0.164 | 0.015 | 0.119 | 0.014 |
| Stanley     | Stanley 3               | Mississippian | 8.197   | 0.237 | 1.172 | 0.485 | 0.089 | 0.431 | 1.410 | 0.151 | 0.298 | 0.106 | 0.029 | 0.088 | 0.014 | 0.050 | 0.012 | 0.063 | 0.008 | 0.019 | 0.008 |
| Stanley     | Stanley 4               | Mississippian | 40.895  | 0.505 | 2.303 | 1.757 | 0.378 | 1.418 | 3.466 | 0.325 | 0.762 | 0.054 | 0.028 | 0.183 | 0.032 | 0.102 | 0.036 | 0.106 | 0.016 | 0.100 | 0.020 |
| Stanley     | Stanley 4 (D)           | Mississippian | 13.759  | 0.337 | 4.336 | 1.509 | 0.417 | 0.724 | 1.800 | 0.244 | 0.920 | 0.182 | 0.050 | 0.226 | 0.035 | 0.092 | 0.019 | 0.068 | 0.009 | 0.060 | 0.012 |
| Chattanooga | CS1 (Chattanooga)       | Devonian      | 63.461  | 0.567 | 2.504 | 1.117 | 0.473 | 0.996 | 2.227 | 0.070 | 0.517 | 0.254 | 0.019 | 0.194 | 0.010 | 0.196 | 0.029 | 0.072 | 0.012 | 0.065 | 0.019 |
| Chattanooga | CS2                     | Devonian      | 43.315  | 0.391 | 2.466 | 0.831 | 0.202 | 1.630 | 2.217 | 0.222 | 1.252 | 0.250 | 0.054 | 0.116 | 0.024 | 0.182 | 0.036 | 0.140 | 0.009 | 0.112 | 0.022 |
| Chattanooga | CS3                     | Devonian      | 23.898  | 0.431 | 0.936 | 0.635 | 0.662 | 1.222 | 2.317 | 0.144 | 0.423 | 0.134 | 0.042 | 0.098 | 0.025 | 0.056 | 0.038 | 0.043 | 0.006 | 0.104 | 0.007 |
| Chattanooga | CS4                     | Devonian      | 39.532  | 0.754 | 2.466 | 1.066 | 0.872 | 1.747 | 2.038 | 0.254 | 1.080 | 0.136 | 0.031 | 0.141 | 0.020 | 0.269 | 0.026 | 0.168 | 0.009 | 0.060 | 0.009 |
| Chattanooga | CS5                     | Devonian      | 85.273  | 0.287 | 3.198 | 0.737 | 0.531 | 0.477 | 1.457 | 0.074 | 1.214 | 0.178 | 0.029 | 0.200 | 0.012 | 0.182 | 0.053 | 0.125 | 0.012 | 0.064 | 0.014 |
| Chattanooga | CS6                     | Devonian      | 194.336 | 0.656 | 2.989 | 0.774 | 0.807 | 1.025 | 2.369 | 0.493 | 1.772 | 0.134 | 0.063 | 0.218 | 0.028 | 0.113 | 0.047 | 0.126 | 0.020 | 0.103 | 0.013 |
| Chattanooga | CS7                     | Devonian      | 44.830  | 1.224 | 4.408 | 2.732 | 0.660 | 0.613 | 1.687 | 0.219 | 1.013 | 0.154 | 0.027 | 0.133 | 0.012 | 0.058 | 0.023 | 0.065 | 0.018 | 0.034 | 0.005 |
| Chattanooga | CS7 (R)                 | Devonian      | 41.008  | 0.775 | 2.726 | 1.492 | 0.435 | 1.206 | 1.957 | 0.269 | 0.418 | 0.129 | 0.045 | 0.227 | 0.027 | 0.106 | 0.028 | 0.090 | 0.009 | 0.154 | 0.019 |
| Chattanooga | CS8                     | Devonian      | 16.717  | 0.965 | 4.150 | 1.757 | 0.349 | 0.724 | 0.958 | 0.289 | 0.442 | 0.183 | 0.009 | 0.191 | 0.030 | 0.155 | 0.048 | 0.061 | 0.007 | 0.114 | 0.011 |
| Chattanooga | CS9                     | Devonian      | 31.871  | 0.609 | 3.061 | 1.446 | 0.785 | 0.408 | 2.356 | 0.284 | 0.870 | 0.258 | 0.034 | 0.123 | 0.017 | 0.134 | 0.028 | 0.095 | 0.016 | 0.097 | 0.015 |
| Chattanooga | CS10B                   | Devonian      | 34.046  | 0.881 | 5.511 | 0.702 | 0.483 | 1.034 | 2.665 | 0.267 | 0.900 | 0.171 | 0.020 | 0.050 | 0.008 | 0.070 | 0.020 | 0.049 | 0.010 | 0.052 | 0.009 |
| Chattanooga | CS11                    | Devonian      | 60.073  | 1.107 | 1.835 | 1.329 | 0.563 | 1.231 | 1.603 | 0.184 | 0.980 | 0.132 | 0.057 | 0.113 | 0.037 | 0.099 | 0.039 | 0.067 | 0.012 | 0.099 | 0.012 |
| Chattanooga | CS12                    | Devonian      | 54.827  | 1.154 | 5.217 | 1.367 | 0.441 | 1.381 | 1.199 | 0.116 | 1.389 | 0.218 | 0.045 | 0.117 | 0.031 | 0.069 | 0.044 | 0.079 | 0.011 | 0.055 | 0.019 |
| Chattanooga | CS13                    | Devonian      | 26.409  | 0.419 | 3.325 | 0.907 | 0.580 | 0.646 | 1.612 | 0.207 | 1.370 | 0.201 | 0.053 | 0.287 | 0.027 | 0.083 | 0.026 | 0.117 | 0.010 | 0.161 | 0.019 |
| New Albany  | Ceja Corp Morris #1     | Devonian      | 1.370   | 0.194 | 1.439 | 0.711 | 0.255 | 0.249 | 0.319 | 0.276 | 0.412 | 0.065 | 0.042 | 0.157 | 0.012 | 0.051 | 0.022 | 0.055 | 0.013 | 0.053 | 0.012 |
| New Albany  | Ceja Corp Morris #1 (R) | Devonian      | 0.566   | 0.164 | 1.135 | 0.375 | 0.255 | 0.350 | 0.533 | 0.084 | 0.251 | 0.175 | 0.018 | 0.180 | 0.012 | 0.076 | 0.020 | 0.069 | 0.006 | 0.056 | 0.008 |
| Polk Creek  | Polk Creek 1            | Ordovician    | 9.520   | 0.047 | 0.364 | 0.061 | 0.048 | 0.071 | 0.184 | 0.028 | 0.198 | 0.038 | 0.004 | 0.055 | 0.007 | 0.045 | 0.013 | 0.019 | 0.005 | 0.036 | 0.004 |
| Polk Creek  | Polk Creek 1 (D)        | Ordovician    | 1.806   | 0.067 | 0.337 | 0.037 | 0.052 | 0.091 | 0.223 | 0.008 | 0.146 | 0.058 | 0.017 | 0.049 | 0.005 | 0.040 | 0.004 | 0.022 | 0.006 | 0.079 | 0.002 |
| Polk Creek  | PC1                     | Ordovician    | 17.154  | 0.041 | 0.206 | 0.145 | 0.141 | 0.148 | 0.216 | 0.022 | 0.138 | 0.031 | 0.012 | 0.026 | 0.003 | 0.045 | 0.008 | 0.020 | 0.003 | 0.032 | 0.006 |
| Polk Creek  | PC1 (R)                 | Ordovician    | 1.708   | 0.027 | 0.199 | 0.163 | 0.179 | 0.120 | 0.308 | 0.018 | 0.131 | 0.030 | 0.011 | 0.063 | 0.008 | 0.017 | 0.013 | 0.035 | 0.005 | 0.041 | 0.003 |
| Womble      | Womble 1                | Ordovician    | 29.371  | 0.567 | 3.607 | 1.019 | 0.329 | 0.349 | 2.142 | 0.146 | 0.451 | 0.064 | 0.006 | 0.081 | 0.009 | 0.086 | 0.010 | 0.029 | 0.008 | 0.066 | 0.006 |
| Womble      | Womble 2                | Ordovician    | 1.859   | 0.029 | 0.061 | 0.062 | 0.051 | 0.184 | 0.168 | 0.017 | 0.141 | 0.016 | 0.005 | 0.045 | 0.003 | 0.010 | 0.001 | 0.017 | 0.003 | 0.019 | 0.003 |
| Womble      | Womble 3                | Ordovician    | 2.264   | 0.026 | 0.172 | 0.144 | 0.064 | 0.092 | 0.115 | 0.044 | 0.159 | 0.019 | 0.008 | 0.014 | 0.003 | 0.006 | 0.001 | 0.018 | 0.002 | 0.027 | 0.004 |
| Womble      | Womble 3 (D)            | Ordovician    | 8.343   | 0.352 | 0.854 | 0.456 | 0.410 | 0.864 | 2.838 | 0.331 | 0.624 | 0.126 | 0.038 | 0.214 | 0.026 | 0.097 | 0.038 | 0.054 | 0.009 | 0.065 | 0.012 |
| Mazarn      | Mazarn 1                | Ordovician    | 16.800  | 0.055 | 0.762 | 0.273 | 0.037 | 0.062 | 0.071 | 0.036 | 0.139 | 0.037 | 0.006 | 0.037 | 0.004 | 0.025 | 0.007 | 0.028 | 0.002 | 0.031 | 0.002 |
| Mazarn      | Mazarn 2                | Ordovician    | 7.995   | 0.061 | 0.893 | 1.743 | 0.075 | 0.150 | 0.436 | 0.033 | 0.074 | 0.033 | 0.005 | 0.030 | 0.007 | 0.033 | 0.006 | 0.035 | 0.005 | 0.034 | 0.005 |
| Mazarn      | Mazarn 3                | Ordovician    | 0.406   | 0.022 | 0.158 | 8.254 | 0.039 | 0.094 | 0.153 | 0.024 | 0.035 | 0.045 | 0.004 | 0.023 | 0.002 | 0.014 | 0.003 | 0.012 | 0.001 | 0.006 | 0.001 |
| Mazarn      | Mazarn 4                | Ordovician    | 4.116   | 0.073 | 1.326 | 0.792 | 0.311 | 0.237 | 0.540 | 0.095 | 0.268 | 0.083 | 0.005 | 0.074 | 0.015 | 0.033 | 0.015 | 0.041 | 0.006 | 0.033 | 0.004 |
| Collier     | Collier CS1             | Camb.-Ordo.   | 7.052   | 0.113 | 0.805 | 0.878 | 0.077 | 0.172 | 0.343 | 0.037 | 0.210 | 0.043 | 0.007 | 0.055 | 0.006 | 0.047 | 0.010 | 0.033 | 0.004 | 0.053 | 0.004 |
| Collier     | Collier CS1 (R)         | Camb.-Ordo.   | 6.405   | 0.030 | 0.697 | 1.054 | 0.094 | 0.099 | 0.375 | 0.028 | 0.162 | 0.056 | 0.011 | 0.031 | 0.010 | 0.049 | 0.013 | 0.035 | 0.004 | 0.048 | 0.005 |
| Tunnel City | UPH-1-658               | Cambrian      | 3.174   | 0.055 | 1.242 | 1.069 | 0.397 | 0.518 | 0.854 | 0.114 | 0.294 | 0.040 | 0.010 | 0.067 | 0.006 | 0.048 | 0.011 | 0.026 | 0.006 | 0.037 | 0.007 |
| Eau Claire  | HwyA-2-520              | Cambrian      | 13.623  | 0.126 | 1.748 | 0.431 | 0.167 | 0.461 | 0.522 | 0.052 | 0.248 | 0.064 | 0.020 | 0.039 | 0.007 | 0.056 | 0.004 | 0.035 | 0.002 | 0.020 | 0.002 |
| Eau Claire  | UPH-1-853               | Cambrian      | 2.564   | 0.120 | 1.996 | 0.381 | 0.142 | 0.575 | 0.391 | 0.099 | 0.143 | 0.047 | 0.015 | 0.053 | 0.003 | 0.030 | 0.003 | 0.017 | 0.004 | 0.024 | 0.002 |
| Eau Claire  | UPH-1-977               | Cambrian      | 27.842  | 0.066 | 2.342 | 0.592 | 0.026 | 0.229 | 0.139 | 0.034 | 0.063 | 0.027 | 0.004 | 0.019 | 0.004 | 0.026 | 0.005 | 0.018 | 0.002 | 0.022 | 0.006 |
| Mt. Simon   | UPH-1-1363              | Cambrian      | 2.709   | 0.117 | 1.968 | 2.383 | 0.096 | 0.416 | 1.161 | 0.078 | 0.508 | 0.035 | 0.016 | 0.080 | 0.011 | 0.039 | 0.011 | 0.035 | 0.006 | 0.011 | 0.006 |
